# Supplementary material for: Experimental and theoretical study for CO2 activation and chemical fixation with epoxides
Source: Royal Society of Chemistry journal article supplement (doi:10.1039/c8ra10475a), 2019-01-01
Supplement: c8ra10475a1.pdf [file c8ra10475a1.pdf]

## Electronic supplementary information

for

### Experimental and theoretical study for CO<sub>2</sub> activation and chemical fixation with epoxides

Jinwei Gao,<sup>a,b</sup> Liuyi Li,<sup>b</sup> Caiyan Cui,<sup>b</sup> Muhammad Asad Ziaee,<sup>b</sup> Yaqiong Gong,<sup>a</sup> Rongjian Sa,<sup>\*c</sup> Hong Zhong<sup>\*a,b</sup>

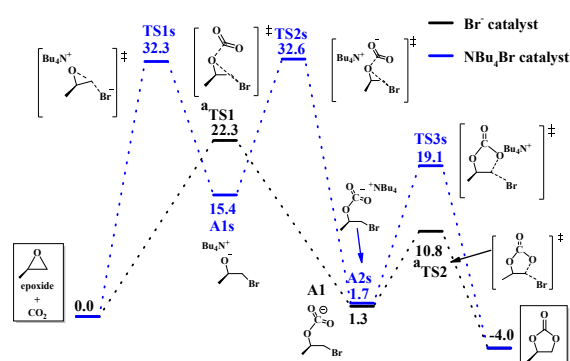

**Figure S1.** Free energy profiles for carbonate formation with bromine as catalyst.

Including nBu<sub>4</sub>N<sup>+</sup> cation (shown in blue) the reaction energies is larger than the reaction without nBu<sub>4</sub>N<sup>+</sup> cation included (shown in black). Then the nBu<sub>4</sub>N<sup>+</sup> can be reduced eliminating in the further calculations.

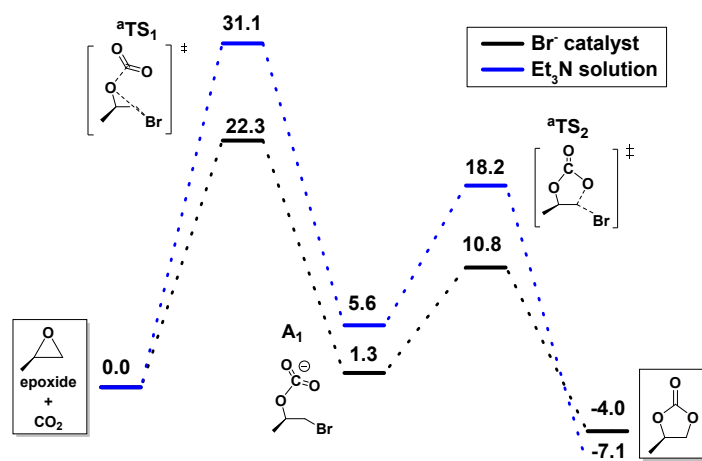

**Figure S2.** Free energy profiles with (shown in blue) or without (shown in black) triethylamine as solvent.

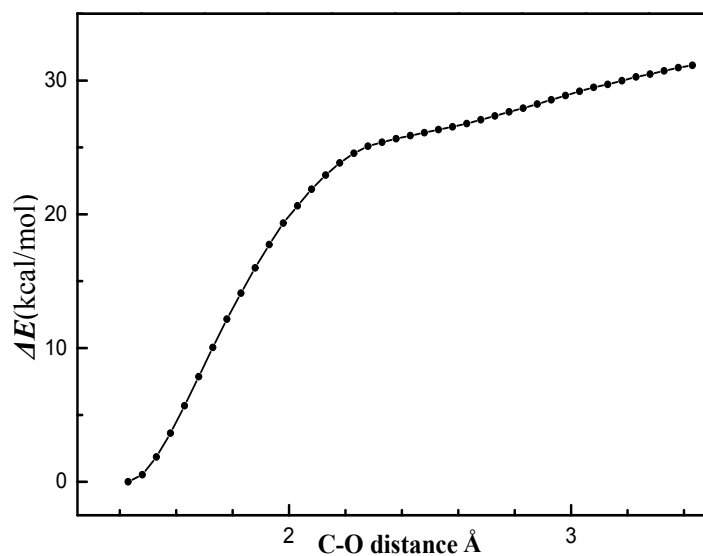

**FigureS3.** Potential Energy Surfaces scan along the distances between C atom of CO<sub>2</sub> moiety and O atom of epoxide moiety with one step set to 0.05 Å. No further transition states obtained in the formation of C1 intermediate after a potential energy surfaces scan calculation.

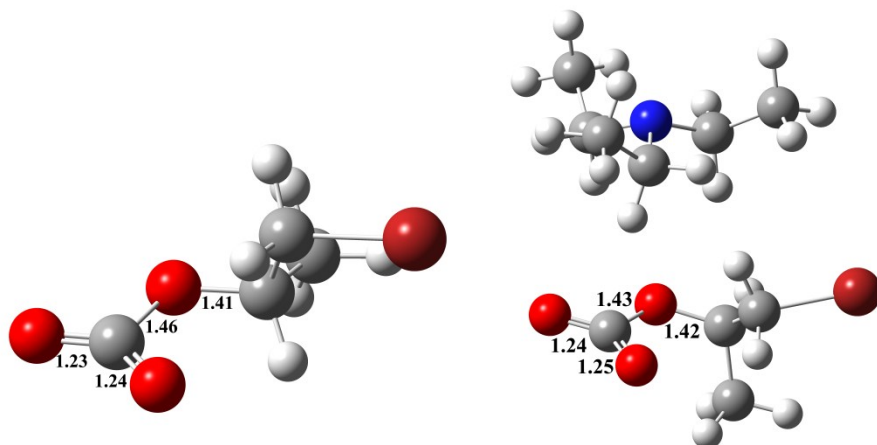

**Figure S4.** The bond length of A<sub>1</sub> and C<sub>1</sub> intermediate (only the bond around CO<sub>2</sub> moiety shown) in Å.

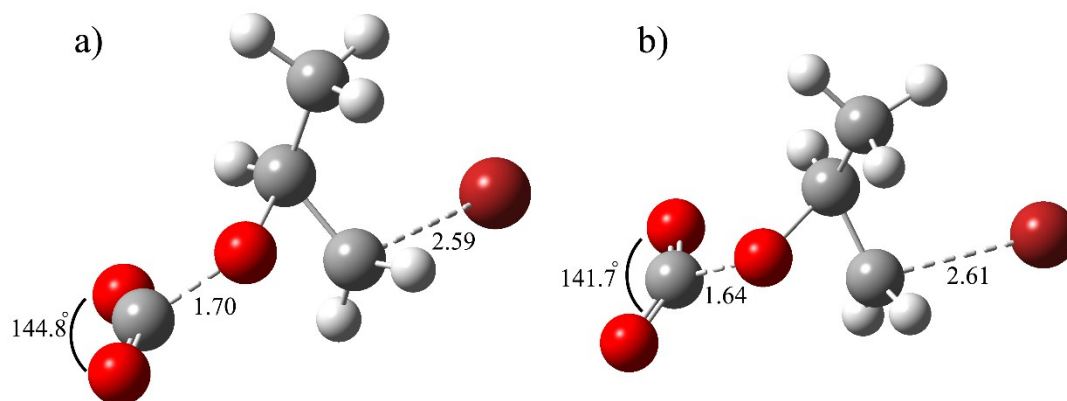

**Figure S5.** The optimized structure difference of <sup>a</sup>TS1 in gas-phase (a) and TEA solvent (b).

**<sup>1</sup>H NMR spectrum**

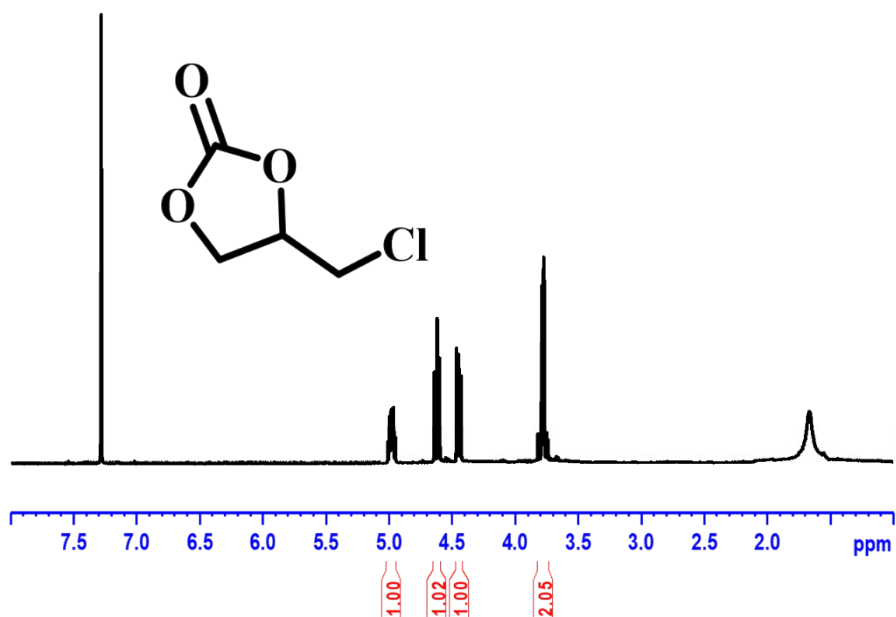

Figure S6. <sup>1</sup>H NMR spectrum in chloroform-d

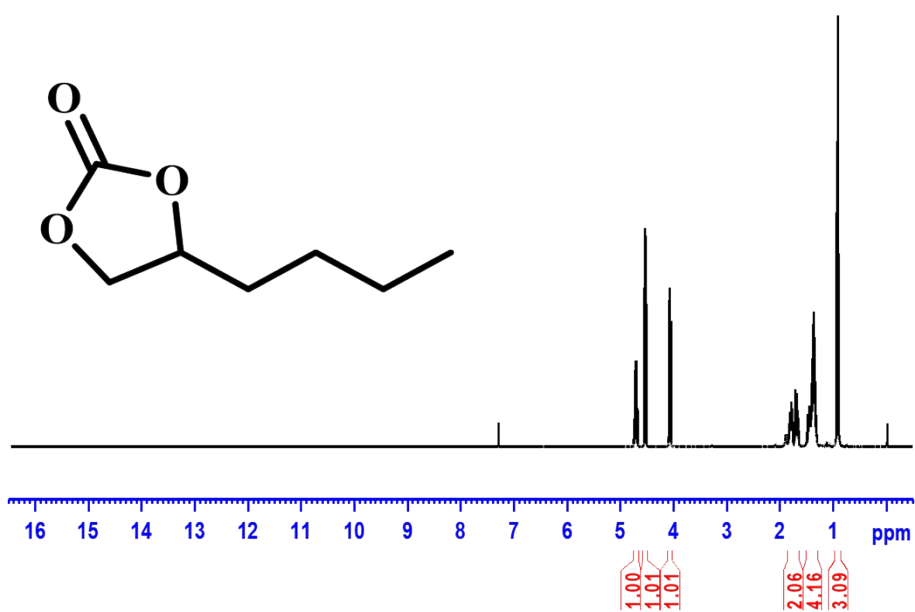

Figure S7. <sup>1</sup>H NMR spectrum in chloroform-d

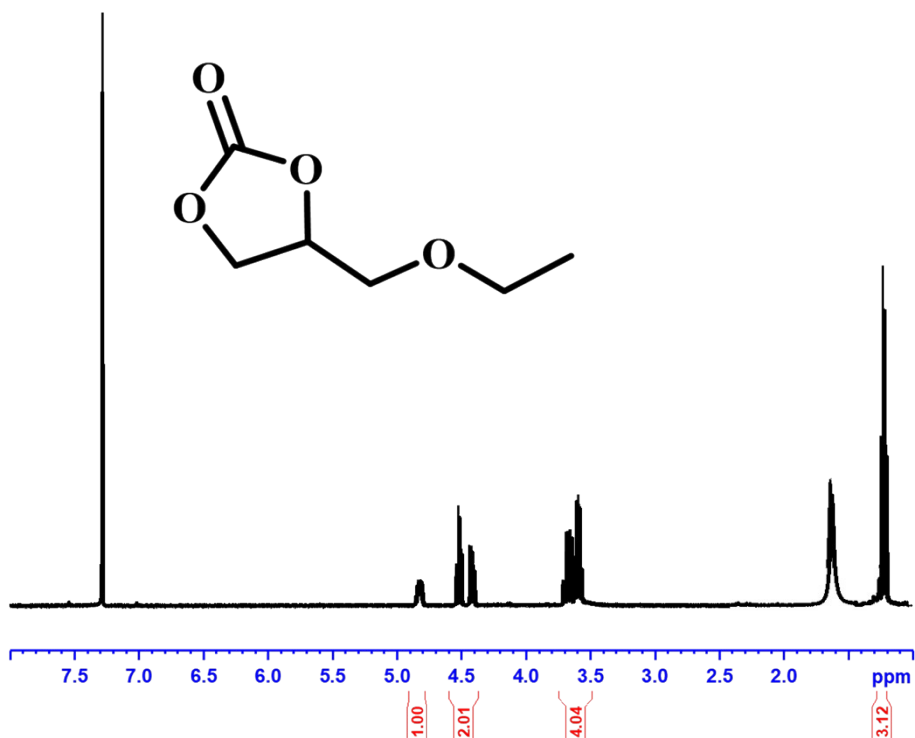

Figure S8. <sup>1</sup>H NMR spectrum in chloroform-d

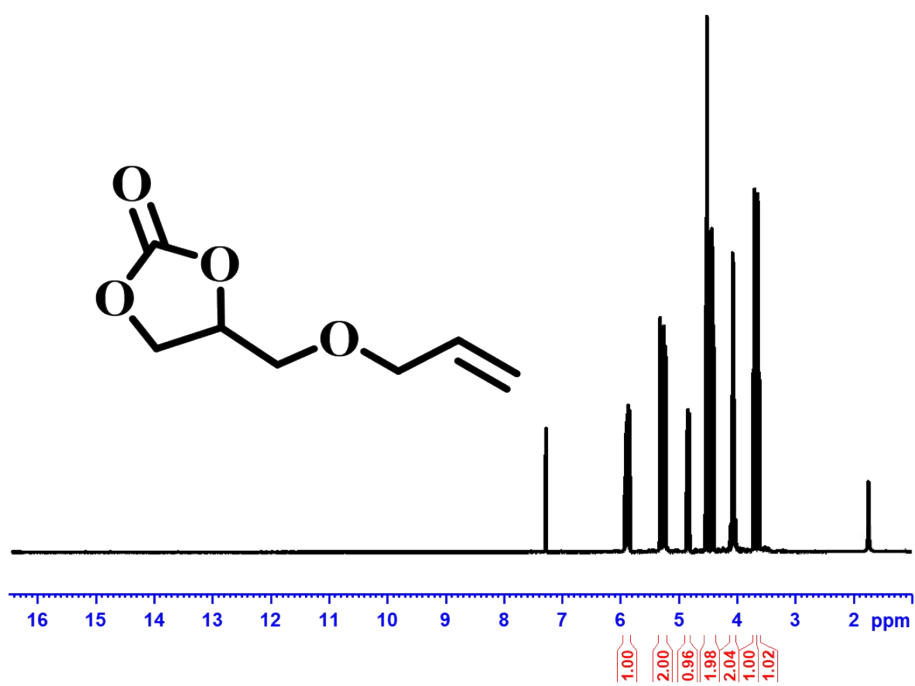

Figure S9. <sup>1</sup>H NMR spectrum in chloroform-d

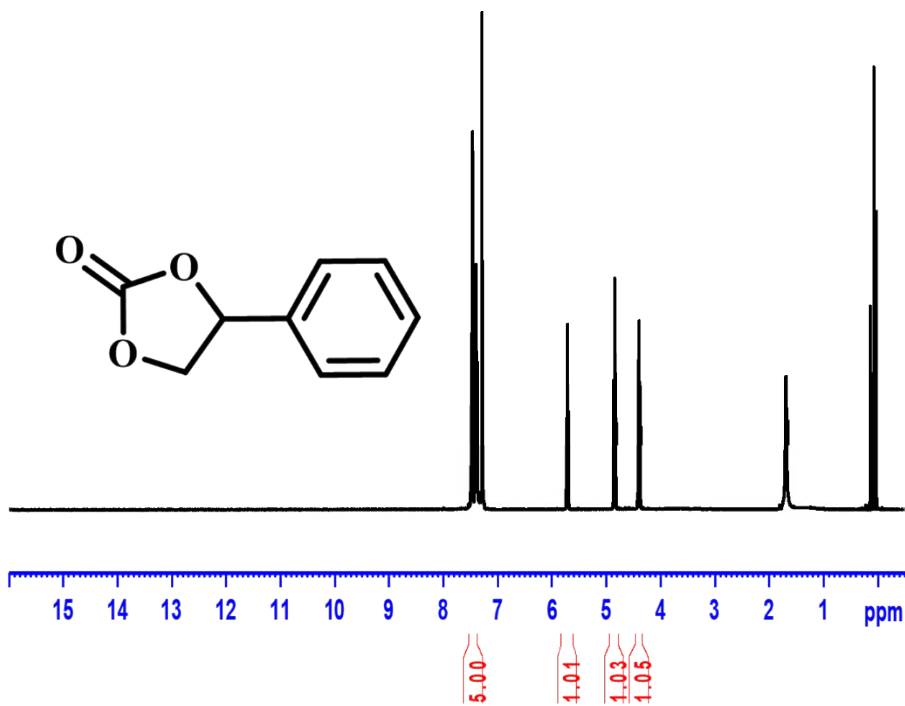

Figure S10.  $^1\text{H}$  NMR spectrum in chloroform-d

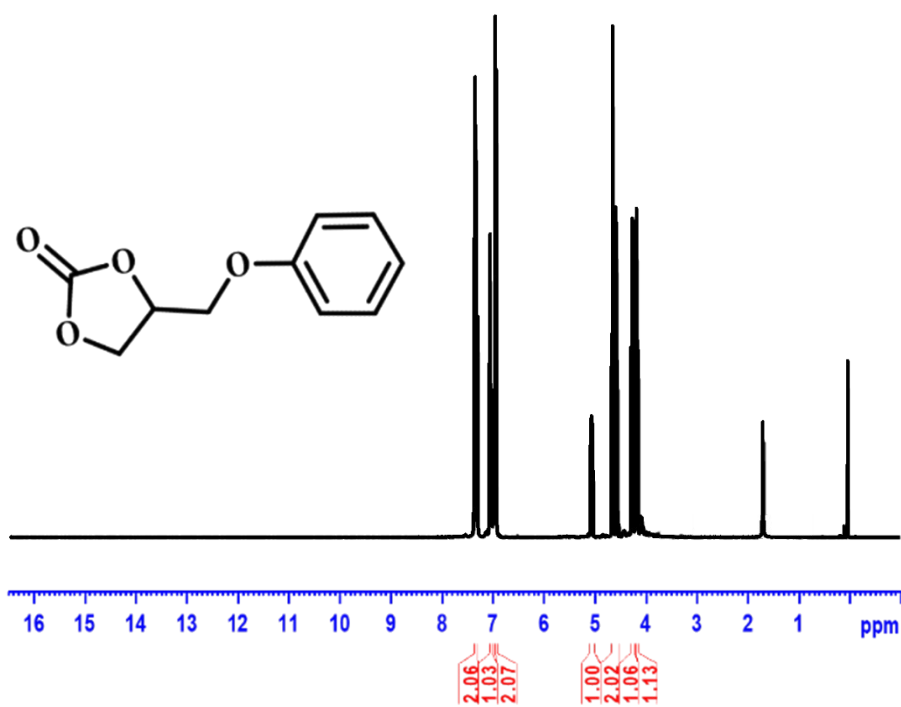

Figure S11.  $^1\text{H}$  NMR spectrum in chloroform-d

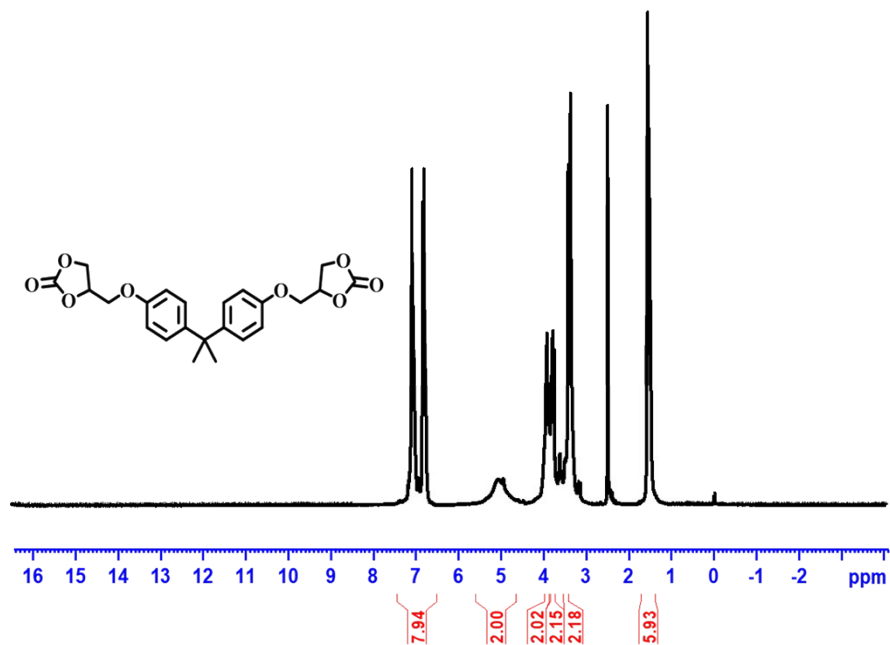

Figure S12.  $^1\text{H}$  NMR spectrum in  $\text{dms0-d6}$

## Cartesian Coordinates and Energies.

### Epoxide

Cartesian coordinates and thermal corrections at M06-2X/6-31+G(d,p) in gas phase

|                                              |          |           |           |                             |
|----------------------------------------------|----------|-----------|-----------|-----------------------------|
| C                                            | 0.752861 | -0.236626 | -0.000424 |                             |
| C                                            | 2.222468 | -0.253394 | 0.014856  |                             |
| N                                            | 1.502886 | 0.971129  | -0.023744 |                             |
| H                                            | 0.214206 | -0.464139 | -0.917433 |                             |
| H                                            | 0.215548 | -0.426790 | 0.927170  |                             |
| H                                            | 2.729416 | -0.487960 | -0.921626 |                             |
| C                                            | 2.996253 | -0.528517 | 1.274874  |                             |
| H                                            | 3.265938 | -1.586852 | 1.338565  |                             |
| H                                            | 3.915817 | 0.063100  | 1.295792  |                             |
| H                                            | 2.396332 | -0.262741 | 2.149078  |                             |
| Zero-point correction=                       |          |           |           | 0.086529 (Hartree/Particle) |
| Thermal correction to Energy=                |          |           |           | 0.090879                    |
| Thermal correction to Enthalpy=              |          |           |           | 0.091824                    |
| Thermal correction to Gibbs Free Energy=     |          |           |           | 0.060211                    |
| Sum of electronic and zero-point Energies=   |          |           |           | -192.944191                 |
| Sum of electronic and thermal Energies=      |          |           |           | -192.939841                 |
| Sum of electronic and thermal Enthalpies=    |          |           |           | -192.938896                 |
| Sum of electronic and thermal Free Energies= |          |           |           | -192.970509                 |

SCF-energy at M06-2X/6-311+G(d,p)

$E_{\text{scf}} = -193.0768305$  au

**Cartesian coordinates and thermal corrections at M06-2X/6-31+G(d,p) in TEA solvent.**

|   |          |           |           |
|---|----------|-----------|-----------|
| C | 0.753671 | -0.237962 | -0.000025 |
| C | 2.221508 | -0.253683 | 0.016104  |
| N | 1.501666 | 0.975439  | -0.027245 |
| H | 0.215740 | -0.467471 | -0.917515 |
| H | 0.213267 | -0.423804 | 0.926955  |
| H | 2.729835 | -0.488754 | -0.919464 |
| C | 2.995090 | -0.526624 | 1.274676  |
| H | 3.265447 | -1.585671 | 1.334190  |
| H | 3.917216 | 0.062336  | 1.295974  |
| H | 2.398285 | -0.266594 | 2.153456  |

|                                              |                             |
|----------------------------------------------|-----------------------------|
| Zero-point correction=                       | 0.086478 (Hartree/Particle) |
| Thermal correction to Energy=                | 0.090824                    |
| Thermal correction to Enthalpy=              | 0.091768                    |
| Thermal correction to Gibbs Free Energy=     | 0.060169                    |
| Sum of electronic and zero-point Energies=   | -192.949479                 |
| Sum of electronic and thermal Energies=      | -192.945133                 |
| Sum of electronic and thermal Enthalpies=    | -192.944189                 |
| Sum of electronic and thermal Free Energies= | -192.975787                 |

SCF-energy at M06-2X/6-311+G(d,p)

$E_{\text{scf}} = -193.0820879$  au

**CO<sub>2</sub>**

**Cartesian coordinates and thermal corrections at M06-2X/6-31+G(d,p) in gas phase**

|   |           |           |           |
|---|-----------|-----------|-----------|
| C | 0.402264  | -1.135057 | -0.005266 |
| O | -0.760808 | -1.135057 | -0.005266 |
| O | 1.565336  | -1.135057 | -0.005266 |

|                                              |                             |
|----------------------------------------------|-----------------------------|
| Zero-point correction=                       | 0.011927 (Hartree/Particle) |
| Thermal correction to Energy=                | 0.014539                    |
| Thermal correction to Enthalpy=              | 0.015484                    |
| Thermal correction to Gibbs Free Energy=     | -0.009421                   |
| Sum of electronic and zero-point Energies=   | -188.504125                 |
| Sum of electronic and thermal Energies=      | -188.501513                 |
| Sum of electronic and thermal Enthalpies=    | -188.500569                 |
| Sum of electronic and thermal Free Energies= | -188.525474                 |

SCF-energy at M06-2X/6-311+G(d,p)

$E_{\text{scf}} = -188.5745957$  au

**Cartesian coordinates and thermal corrections at M06-2X/6-31+G(d,p) in TEA solvent**

|   |          |           |           |
|---|----------|-----------|-----------|
| C | 0.402264 | -1.135057 | -0.005266 |
|---|----------|-----------|-----------|



|                                              |           |           |           |                             |
|----------------------------------------------|-----------|-----------|-----------|-----------------------------|
| O                                            | -0.760480 | -1.135057 | -0.005266 |                             |
| O                                            | 1.565009  | -1.135057 | -0.005266 |                             |
| Zero-point correction=                       |           |           |           | 0.011819 (Hartree/Particle) |
| Thermal correction to Energy=                |           |           |           | 0.014450                    |
| Thermal correction to Enthalpy=              |           |           |           | 0.015394                    |
| Thermal correction to Gibbs Free Energy=     |           |           |           | -0.008882                   |
| Sum of electronic and zero-point Energies=   |           |           |           | -188.506181                 |
| Sum of electronic and thermal Energies=      |           |           |           | -188.503550                 |
| Sum of electronic and thermal Enthalpies=    |           |           |           | -188.502606                 |
| Sum of electronic and thermal Free Energies= |           |           |           | -188.526882                 |

SCF-energy at M06-2X/6-311+G(d,p)

$E_{\text{scf}} = -188.5765689\text{au}$

### Carbonate

#### Cartesian coordinates and thermal corrections at M06-2X/6-31+G(d,p) in gas phase

|                                              |           |           |           |                             |
|----------------------------------------------|-----------|-----------|-----------|-----------------------------|
| C                                            | -0.492268 | 1.287271  | -0.064822 |                             |
| C                                            | -1.008063 | -0.057180 | 0.464496  |                             |
| O                                            | 0.923119  | 1.109332  | -0.050793 |                             |
| H                                            | -0.813379 | 1.489568  | -1.090884 |                             |
| H                                            | -0.744475 | 2.130152  | 0.580587  |                             |
| C                                            | 1.209668  | -0.215261 | -0.046089 |                             |
| O                                            | 0.075518  | -0.934441 | 0.123949  |                             |
| O                                            | 2.300401  | -0.675753 | -0.172148 |                             |
| C                                            | -1.235131 | -0.079507 | 1.964317  |                             |
| H                                            | -1.425616 | -1.099917 | 2.303089  |                             |
| H                                            | -0.352926 | 0.303648  | 2.487179  |                             |
| H                                            | -2.094847 | 0.544685  | 2.224706  |                             |
| H                                            | -1.887830 | -0.405692 | -0.080033 |                             |
| Zero-point correction=                       |           |           |           | 0.104316 (Hartree/Particle) |
| Thermal correction to Energy=                |           |           |           | 0.110418                    |
| Thermal correction to Enthalpy=              |           |           |           | 0.111362                    |
| Thermal correction to Gibbs Free Energy=     |           |           |           | 0.074134                    |
| Sum of electronic and zero-point Energies=   |           |           |           | -381.477865                 |
| Sum of electronic and thermal Energies=      |           |           |           | -381.471763                 |
| Sum of electronic and thermal Enthalpies=    |           |           |           | -381.470819                 |
| Sum of electronic and thermal Free Energies= |           |           |           | -381.508048                 |

SCF-energy at M06-2X/6-311+G(d,p)

$E_{\text{scf}} = -381.6811057\text{au}$

#### Cartesian coordinates and thermal corrections at M06-2X/6-31+G(d,p) in TEA solvent.

|   |           |           |           |
|---|-----------|-----------|-----------|
| C | -0.496473 | 1.286799  | -0.065753 |
| C | -1.010261 | -0.054374 | 0.466143  |
| O | 0.925754  | 1.107459  | -0.055574 |

|   |           |           |           |
|---|-----------|-----------|-----------|
| H | -0.815397 | 1.486123  | -1.092572 |
| H | -0.745205 | 2.132575  | 0.576826  |
| C | 1.205692  | -0.211087 | -0.044120 |
| O | 0.081624  | -0.933146 | 0.123120  |
| O | 2.301977  | -0.672968 | -0.167785 |
| C | -1.232937 | -0.081088 | 1.963991  |
| H | -1.436124 | -1.100309 | 2.301107  |
| H | -0.348474 | 0.292638  | 2.491200  |
| H | -2.087965 | 0.549027  | 2.226240  |
| H | -1.888039 | -0.404745 | -0.079272 |

|                                              |                             |
|----------------------------------------------|-----------------------------|
| Zero-point correction=                       | 0.104524 (Hartree/Particle) |
| Thermal correction to Energy=                | 0.110596                    |
| Thermal correction to Enthalpy=              | 0.111540                    |
| Thermal correction to Gibbs Free Energy=     | 0.074373                    |
| Sum of electronic and zero-point Energies=   | -381.489467                 |
| Sum of electronic and thermal Energies=      | -381.483395                 |
| Sum of electronic and thermal Enthalpies=    | -381.482451                 |
| Sum of electronic and thermal Free Energies= | -381.519618                 |

SCF-energy at M06-2X/6-311+G(d,p)

$E_{\text{scf}} = -381.693002\text{au}$

**Br<sup>-</sup>**

**Thermal corrections at M06-2X/6-31+G(d,p) in gas phase**

|                                              |                             |
|----------------------------------------------|-----------------------------|
| Zero-point correction=                       | 0.000000 (Hartree/Particle) |
| Thermal correction to Energy=                | 0.001416                    |
| Thermal correction to Enthalpy=              | 0.002360                    |
| Thermal correction to Gibbs Free Energy=     | -0.016176                   |
| Sum of electronic and zero-point Energies=   | -2571.868813                |
| Sum of electronic and thermal Energies=      | -2571.867396                |
| Sum of electronic and thermal Enthalpies=    | -2571.866452                |
| Sum of electronic and thermal Free Energies= | -2571.884988                |

SCF-energy at M06-2X/6-311+G(d,p)

$E_{\text{scf}} = -2574.2563064\text{au}$

**Thermal corrections at M06-2X/6-31+G(d,p) in TEA solvent**

|                                            |                             |
|--------------------------------------------|-----------------------------|
| Zero-point correction=                     | 0.000000 (Hartree/Particle) |
| Thermal correction to Energy=              | 0.001416                    |
| Thermal correction to Enthalpy=            | 0.002360                    |
| Thermal correction to Gibbs Free Energy=   | -0.016176                   |
| Sum of electronic and zero-point Energies= | -2571.921767                |
| Sum of electronic and thermal Energies=    | -2571.920351                |
| Sum of electronic and thermal Enthalpies=  | -2571.919407                |

Sum of electronic and thermal Free Energies= -2571.937943  
SCF-energy at M06-2X/6-311+G(d,p)  
E<sub>scf</sub>= -2574.3096898au

### Trimethylamine

#### Cartesian coordinates and thermal corrections at M06-2X/6-31+G(d,p) in TEA solvent

|   |           |           |           |
|---|-----------|-----------|-----------|
| N | -0.003700 | 0.000310  | -0.012683 |
| C | -1.315118 | 0.485564  | 0.421692  |
| C | 1.062795  | 0.891633  | 0.448789  |
| C | -2.457246 | -0.036594 | -0.439726 |
| C | 1.210500  | 2.130587  | -0.424807 |
| C | 0.224682  | -1.375484 | 0.432411  |
| C | 1.276908  | -2.098301 | -0.398299 |
| H | -1.309662 | 1.578028  | 0.360927  |
| H | -1.488857 | 0.232773  | 1.485724  |
| H | 2.006413  | 0.338524  | 0.426707  |
| H | 0.895337  | 1.181500  | 1.504148  |
| H | -3.410579 | 0.378900  | -0.097651 |
| H | -2.543043 | -1.126608 | -0.402298 |
| H | -2.304681 | 0.254618  | -1.483149 |
| H | 2.016715  | 2.769344  | -0.049721 |
| H | 0.296693  | 2.732082  | -0.447384 |
| H | 1.447160  | 1.839999  | -1.452624 |
| H | -0.718787 | -1.921978 | 0.343886  |
| H | 0.499899  | -1.396629 | 1.504910  |
| H | 1.388763  | -3.131115 | -0.052959 |
| H | 2.259246  | -1.621562 | -0.330512 |
| H | 0.979744  | -2.112986 | -1.451021 |

|                                              |                             |
|----------------------------------------------|-----------------------------|
| Zero-point correction=                       | 0.206956 (Hartree/Particle) |
| Thermal correction to Energy=                | 0.216416                    |
| Thermal correction to Enthalpy=              | 0.217360                    |
| Thermal correction to Gibbs Free Energy=     | 0.172693                    |
| Sum of electronic and zero-point Energies=   | -292.076719                 |
| Sum of electronic and thermal Energies=      | -292.067260                 |
| Sum of electronic and thermal Enthalpies=    | -292.066316                 |
| Sum of electronic and thermal Free Energies= | -292.110983                 |

SCF-energy at M06-2X/6-311+G(d,p)  
E<sub>scf</sub>= -292.346056au

<sup>a</sup>TS1

#### Cartesian coordinates and thermal corrections at M06-2X/6-31+G(d,p) in gas phase

|                                              |           |                  |                             |
|----------------------------------------------|-----------|------------------|-----------------------------|
| C                                            | -0.58393  | 0.81098          | -0.33167                    |
| C                                            | 0.06616   | -0.08376         | 0.63993                     |
| O                                            | -1.74894  | 0.60479          | 0.36463                     |
| H                                            | 0.23122   | 0.32591          | 1.62917                     |
| H                                            | -0.19219  | -1.13159         | 0.58243                     |
| Br                                           | 2.33813   | -0.44544         | 0.14867                     |
| H                                            | -0.56583  | 0.39437          | -1.35812                    |
| C                                            | -0.07908  | 2.24536          | -0.34756                    |
| H                                            | -0.03179  | 2.62637          | 0.67928                     |
| H                                            | 0.91668   | 2.31807          | -0.79899                    |
| H                                            | -0.77519  | 2.8758           | -0.91237                    |
| Zero-point correction=                       |           |                  | 0.084871 (Hartree/Particle) |
| Thermal correction to Energy=                |           |                  | 0.090857                    |
| Thermal correction to Enthalpy=              |           |                  | 0.091801                    |
| Thermal correction to Gibbs Free Energy=     |           |                  | 0.053888                    |
| Sum of electronic and zero-point Energies=   |           |                  | -2764.792760                |
| Sum of electronic and thermal Energies=      |           |                  | -2764.786775                |
| Sum of electronic and thermal Enthalpies=    |           |                  | -2764.785830                |
| Sum of electronic and thermal Free Energies= |           |                  | -2764.823744                |
| Imaginary frequency:                         | 427.4129  | cm <sup>-1</sup> |                             |
| IR Intensity:                                | 1059.9617 |                  |                             |

SCF-energy at M06-2X/6-311+G(d,p)

$E_{\text{scf}} = -2767.3045104\text{au}$

**Cartesian coordinates and thermal corrections at M06-2X/6-31+G(d,p) in TEA solvent**

|                                            |           |           |                             |
|--------------------------------------------|-----------|-----------|-----------------------------|
| C                                          | 1.114602  | 0.741141  | -0.655378                   |
| C                                          | 0.325870  | -0.501343 | -0.712713                   |
| O                                          | 2.201813  | -0.014897 | -1.014868                   |
| H                                          | 0.116877  | -0.887944 | -1.702777                   |
| H                                          | 0.514077  | -1.229286 | 0.063854                    |
| Br                                         | -1.920687 | -0.182848 | -0.101416                   |
| H                                          | 0.719070  | 1.826212  | -1.645412                   |
| C                                          | 1.514485  | 2.578240  | -1.702877                   |
| H                                          | 0.594280  | 1.386735  | -2.642080                   |
| H                                          | -0.216459 | 2.317515  | -1.355439                   |
| H                                          | 1.151123  | 1.164114  | 0.368172                    |
| Zero-point correction=                     |           |           | 0.084841 (Hartree/Particle) |
| Thermal correction to Energy=              |           |           | 0.090887                    |
| Thermal correction to Enthalpy=            |           |           | 0.091831                    |
| Thermal correction to Gibbs Free Energy=   |           |           | 0.053730                    |
| Sum of electronic and zero-point Energies= |           |           | -2764.841737                |
| Sum of electronic and thermal Energies=    |           |           | -2764.835691                |

Sum of electronic and thermal Enthalpies= -2764.834747  
Sum of electronic and thermal Free Energies= -2764.872847  
Imaginary frequency: 478.2540 cm<sup>-1</sup>  
IR Intensity: 1433.0586

SCF-energy at M06-2X/6-311+G(d,p)  
E<sub>scf</sub>= -2767.353739au

## A1

### Cartesian coordinates and thermal corrections at M06-2X/6-31+G(d,p) in gas phase

|    |           |           |           |
|----|-----------|-----------|-----------|
| C  | 1.671069  | 0.503030  | -0.160313 |
| C  | 0.677193  | -0.665231 | -0.247972 |
| O  | 2.851950  | -0.049471 | -0.474566 |
| H  | 0.560416  | -1.007985 | -1.277374 |
| H  | 0.991045  | -1.476964 | 0.404758  |
| Br | -1.229740 | -0.277994 | 0.372791  |
| C  | 1.242016  | 1.640617  | -1.110104 |
| H  | 1.998373  | 2.431676  | -1.068960 |
| H  | 1.218815  | 1.250541  | -2.136266 |
| H  | 0.259498  | 2.062856  | -0.859788 |
| H  | 1.592950  | 0.908635  | 0.885191  |

|                                              |                             |
|----------------------------------------------|-----------------------------|
| Zero-point correction=                       | 0.085084 (Hartree/Particle) |
| Thermal correction to Energy=                | 0.091256                    |
| Thermal correction to Enthalpy=              | 0.092200                    |
| Thermal correction to Gibbs Free Energy=     | 0.054065                    |
| Sum of electronic and zero-point Energies=   | -2764.797088                |
| Sum of electronic and thermal Energies=      | -2764.790916                |
| Sum of electronic and thermal Enthalpies=    | -2764.789972                |
| Sum of electronic and thermal Free Energies= | -2764.828107                |

SCF-energy at M06-2X/6-311+G(d,p)  
E<sub>scf</sub>= -2767.3072016au

### Cartesian coordinates and thermal corrections at M06-2X/6-31+G(d,p) in TEA solvent

|    |           |           |           |
|----|-----------|-----------|-----------|
| C  | 1.667878  | 0.497483  | -0.161324 |
| C  | 0.666941  | -0.665942 | -0.249047 |
| O  | 2.867563  | -0.033867 | -0.460148 |
| H  | 0.547024  | -1.008908 | -1.278868 |
| H  | 0.987732  | -1.485567 | 0.391876  |
| Br | -1.202017 | -0.260825 | 0.386388  |
| C  | 1.243044  | 1.633317  | -1.110822 |
| H  | 1.990326  | 2.433033  | -1.062907 |
| H  | 1.225518  | 1.253507  | -2.141274 |

|                                              |          |          |           |                             |
|----------------------------------------------|----------|----------|-----------|-----------------------------|
| H                                            | 0.257851 | 2.053561 | -0.868944 |                             |
| H                                            | 1.581724 | 0.903916 | 0.882470  |                             |
| Zero-point correction=                       |          |          |           | 0.085463 (Hartree/Particle) |
| Thermal correction to Energy=                |          |          |           | 0.091559                    |
| Thermal correction to Enthalpy=              |          |          |           | 0.092504                    |
| Thermal correction to Gibbs Free Energy=     |          |          |           | 0.054527                    |
| Sum of electronic and zero-point Energies=   |          |          |           | -2764.849378                |
| Sum of electronic and thermal Energies=      |          |          |           | -2764.843282                |
| Sum of electronic and thermal Enthalpies=    |          |          |           | -2764.842338                |
| Sum of electronic and thermal Free Energies= |          |          |           | -2764.880314                |

SCF-energy at M06-2X/6-311+G(d,p)

$E_{\text{scf}} = -2767.3598537\text{au}$

**<sup>a</sup>TS<sub>2</sub>**

**Cartesian coordinates and thermal corrections at M06-2X/6-31+G(d,p) in gas phase**

|                                              |           |                  |           |                             |
|----------------------------------------------|-----------|------------------|-----------|-----------------------------|
| C                                            | -1.234806 | 0.981867         | -0.148252 |                             |
| C                                            | -0.687402 | 0.145398         | 0.899504  |                             |
| O                                            | -2.341564 | 0.683806         | 0.714825  |                             |
| H                                            | -0.411402 | 0.587609         | 1.845036  |                             |
| H                                            | -0.739655 | -0.928932        | 0.797218  |                             |
| Br                                           | 1.842148  | 0.035463         | 0.373937  |                             |
| C                                            | -0.870531 | 2.440533         | -0.192294 |                             |
| H                                            | -0.868922 | 2.855897         | 0.819562  |                             |
| H                                            | 0.134080  | 2.540407         | -0.612439 |                             |
| H                                            | -1.586616 | 2.997575         | -0.803600 |                             |
| H                                            | -1.331478 | 0.492878         | -1.117577 |                             |
| C                                            | -3.460133 | -0.483817        | 0.174932  |                             |
| O                                            | -3.065677 | -0.965188        | -0.858739 |                             |
| O                                            | -4.338833 | -0.499047        | 0.992577  |                             |
| Zero-point correction=                       |           |                  |           | 0.099256 (Hartree/Particle) |
| Thermal correction to Energy=                |           |                  |           | 0.108574                    |
| Thermal correction to Enthalpy=              |           |                  |           | 0.109518                    |
| Thermal correction to Gibbs Free Energy=     |           |                  |           | 0.062238                    |
| Sum of electronic and zero-point Energies=   |           |                  |           | -2953.318462                |
| Sum of electronic and thermal Energies=      |           |                  |           | -2953.309144                |
| Sum of electronic and thermal Enthalpies=    |           |                  |           | -2953.308200                |
| Sum of electronic and thermal Free Energies= |           |                  |           | -2953.355480                |
| Imaginary frequency:                         | 523.9255  | cm <sup>-1</sup> |           |                             |
| IR Intensity:                                | 1860.0924 |                  |           |                             |

SCF-energy at M06-2X/6-311+G(d,p)

$E_{\text{scf}} = -2955.8997816\text{au}$

**Cartesian coordinates and thermal corrections at M06-2X/6-31+G(d,p) in TEA solvent**

|    |           |           |           |
|----|-----------|-----------|-----------|
| C  | -0.505298 | 0.724207  | -0.281429 |
| C  | 0.338453  | -0.152633 | 0.636700  |
| O  | -1.825195 | 0.705928  | 0.222247  |
| C  | -2.615304 | -0.463903 | -0.049893 |
| O  | -2.063760 | -1.348509 | -0.730736 |
| O  | -3.742788 | -0.392470 | 0.452674  |
| H  | 0.435936  | 0.291338  | 1.628816  |
| H  | -0.078658 | -1.155763 | 0.691694  |
| Br | 2.166486  | -0.369997 | -0.039409 |
| H  | -0.477263 | 0.303229  | -1.292177 |
| C  | -0.044868 | 2.171693  | -0.279280 |
| H  | -0.100754 | 2.584618  | 0.734239  |
| H  | 0.984734  | 2.258103  | -0.638370 |
| H  | -0.692767 | 2.770304  | -0.925492 |

|                                                |                             |
|------------------------------------------------|-----------------------------|
| Zero-point correction=                         | 0.102553 (Hartree/Particle) |
| Thermal correction to Energy=                  | 0.111112                    |
| Thermal correction to Enthalpy=                | 0.112056                    |
| Thermal correction to Gibbs Free Energy=       | 0.066906                    |
| Sum of electronic and zero-point Energies=     | -2953.412090                |
| Sum of electronic and thermal Energies=        | -2953.403531                |
| Sum of electronic and thermal Enthalpies=      | -2953.402587                |
| Sum of electronic and thermal Free Energies=   | -2953.447737                |
| Imaginary frequency: 534.5117 cm <sup>-1</sup> |                             |
| IR Intensity: 2236.1393                        |                             |

SCF-energy at M06-2X/6-31+G(d,p)

E<sub>scf</sub>= -2955.946891au

<sup>b</sup>TS<sub>1</sub>

**Cartesian coordinates and thermal corrections at M06-2X/6-31+G(d,p) in TEA solvent**

|   |           |           |           |
|---|-----------|-----------|-----------|
| C | 0.681289  | -1.315266 | -1.388473 |
| C | 1.891422  | -1.383830 | -0.516921 |
| O | 1.569162  | -0.101841 | -0.173619 |
| H | 0.764444  | -0.610598 | -2.206522 |
| H | -0.258191 | -1.320336 | -0.844023 |
| H | 2.834433  | -1.493757 | -1.087610 |
| C | 1.903433  | -2.351691 | 0.659212  |
| H | 2.113693  | -3.390275 | 0.376899  |
| H | 2.686310  | -2.023111 | 1.351093  |
| H | 0.950332  | -2.305275 | 1.197049  |
| N | 0.185820  | -2.771661 | -2.586413 |
| C | -1.290336 | -2.755277 | -2.729709 |

|   |           |           |           |
|---|-----------|-----------|-----------|
| C | 0.641950  | -4.068074 | -2.033593 |
| C | -1.855412 | -1.507116 | -3.395754 |
| C | -0.148530 | -4.554848 | -0.827072 |
| C | 0.824743  | -2.521573 | -3.899957 |
| C | 2.341371  | -2.634119 | -3.905424 |
| H | -1.712574 | -2.843138 | -1.725951 |
| H | -1.596534 | -3.650462 | -3.294374 |
| H | 1.692681  | -3.943211 | -1.761381 |
| H | 0.593496  | -4.824735 | -2.833311 |
| H | -2.944469 | -1.530840 | -3.300191 |
| H | -1.623817 | -1.457307 | -4.462122 |
| H | -1.502546 | -0.590015 | -2.915858 |
| H | 0.400838  | -5.373351 | -0.353277 |
| H | -1.132634 | -4.939442 | -1.105907 |
| H | -0.279363 | -3.769150 | -0.078953 |
| H | 0.546251  | -1.511343 | -4.209558 |
| H | 0.393535  | -3.222596 | -4.631950 |
| H | 2.706193  | -2.326144 | -4.889268 |
| H | 2.690797  | -3.654463 | -3.730963 |
| H | 2.796147  | -1.975403 | -3.161553 |

|                                                |                             |
|------------------------------------------------|-----------------------------|
| Zero-point correction=                         | 0.296439 (Hartree/Particle) |
| Thermal correction to Energy=                  | 0.309984                    |
| Thermal correction to Enthalpy=                | 0.310929                    |
| Thermal correction to Gibbs Free Energy=       | 0.257492                    |
| Sum of electronic and zero-point Energies=     | -484.979341                 |
| Sum of electronic and thermal Energies=        | -484.965795                 |
| Sum of electronic and thermal Enthalpies=      | -484.964851                 |
| Sum of electronic and thermal Free Energies=   | -485.018287                 |
| Imaginary frequency: 582.7656 cm <sup>-1</sup> |                             |
| IR Intensity: 1394.1001                        |                             |

SCF-energy at M06-2X/6-311+G(d,p)

$E_{\text{scf}} = -485.3851638\text{au}$

## B1

**Cartesian coordinates and thermal corrections at M06-2X/6-31+G(d,p) in TEA solvent**

|   |          |          |          |
|---|----------|----------|----------|
| C | 0.31553  | -1.6058  | -1.28793 |
| C | 1.68457  | -1.1239  | -0.69086 |
| O | 1.33435  | -0.11475 | 0.11505  |
| H | -0.12589 | -0.70776 | -1.71858 |
| H | -0.30574 | -1.922   | -0.44711 |
| H | 2.32677  | -0.8118  | -1.55636 |
| C | 2.44891  | -2.23383 | 0.0635   |



|                                              |          |          |                             |
|----------------------------------------------|----------|----------|-----------------------------|
| H                                            | 2.91474  | -3.00617 | -0.56385                    |
| H                                            | 3.24759  | -1.74078 | 0.62557                     |
| H                                            | 1.78646  | -2.71635 | 0.79432                     |
| N                                            | 0.14011  | -2.68751 | -2.37226                    |
| C                                            | -1.31626 | -2.68781 | -2.79869                    |
| C                                            | 0.47228  | -4.06993 | -1.86264                    |
| C                                            | -1.77126 | -1.4953  | -3.624                      |
| C                                            | -0.44558 | -4.61096 | -0.779                      |
| C                                            | 0.99011  | -2.38519 | -3.58732                    |
| C                                            | 2.44548  | -2.81886 | -3.52306                    |
| H                                            | -1.89933 | -2.74429 | -1.87826                    |
| H                                            | -1.46805 | -3.6146  | -3.36323                    |
| H                                            | 1.49351  | -4.02689 | -1.49119                    |
| H                                            | 0.4513   | -4.72642 | -2.73937                    |
| H                                            | -2.84317 | -1.61967 | -3.80183                    |
| H                                            | -1.28347 | -1.44167 | -4.59911                    |
| H                                            | -1.63719 | -0.54391 | -3.10598                    |
| H                                            | -0.02843 | -5.56747 | -0.45164                    |
| H                                            | -1.45987 | -4.80305 | -1.1352                     |
| H                                            | -0.49026 | -3.96185 | 0.09806                     |
| H                                            | 0.92052  | -1.30564 | -3.73691                    |
| H                                            | 0.50172  | -2.88352 | -4.43077                    |
| H                                            | 2.9345   | -2.42376 | -4.41824                    |
| H                                            | 2.56117  | -3.90482 | -3.54133                    |
| H                                            | 2.96887  | -2.41398 | -2.65722                    |
| Zero-point correction=                       |          |          | 0.298825 (Hartree/Particle) |
| Thermal correction to Energy=                |          |          | 0.312271                    |
| Thermal correction to Enthalpy=              |          |          | 0.313216                    |
| Thermal correction to Gibbs Free Energy=     |          |          | 0.260497                    |
| Sum of electronic and zero-point Energies=   |          |          | -484.993879                 |
| Sum of electronic and thermal Energies=      |          |          | -484.980432                 |
| Sum of electronic and thermal Enthalpies=    |          |          | -484.979488                 |
| Sum of electronic and thermal Free Energies= |          |          | -485.032206                 |

SCF-energy at M06-2X/6-311+G(d,p)

$E_{\text{scf}} = -485.4021185\text{au}$

**<sup>b</sup>TS<sub>2</sub>**

**Cartesian coordinates and thermal corrections at M06-2X/6-31+G(d,p) in TEA solvent**

|   |          |           |           |
|---|----------|-----------|-----------|
| C | 0.558930 | -1.053562 | -1.546784 |
| C | 1.756320 | -1.012271 | -0.668298 |
| O | 1.306204 | 0.260695  | -0.395281 |
| H | 0.606188 | -0.409536 | -2.415682 |

|   |           |           |           |
|---|-----------|-----------|-----------|
| H | -0.392450 | -1.124554 | -1.028875 |
| H | 2.709933  | -1.045252 | -1.222783 |
| C | 1.828846  | -1.909365 | 0.555100  |
| H | 2.127833  | -2.936687 | 0.319505  |
| H | 2.572621  | -1.487227 | 1.238828  |
| H | 0.867468  | -1.920468 | 1.078864  |
| N | 0.208256  | -2.629098 | -2.701867 |
| C | -1.259843 | -2.739830 | -2.868609 |
| C | 0.760590  | -3.854498 | -2.082463 |
| C | -1.907517 | -1.572511 | -3.603306 |
| C | -0.004993 | -4.347143 | -0.862214 |
| C | 0.852709  | -2.379763 | -4.011941 |
| C | 2.373523  | -2.354790 | -3.982279 |
| H | -1.693824 | -2.812426 | -1.868388 |
| H | -1.486026 | -3.681742 | -3.394392 |
| H | 1.793914  | -3.631786 | -1.805174 |
| H | 0.787554  | -4.651413 | -2.843650 |
| H | -2.993119 | -1.668403 | -3.514438 |
| H | -1.668115 | -1.561015 | -4.669004 |
| H | -1.626088 | -0.608516 | -3.170379 |
| H | 0.598965  | -5.100273 | -0.348128 |
| H | -0.953778 | -4.817267 | -1.131968 |
| H | -0.204975 | -3.541752 | -0.151104 |
| H | 0.492692  | -1.413079 | -4.373124 |
| H | 0.502410  | -3.146123 | -4.722168 |
| H | 2.732711  | -2.040641 | -4.966285 |
| H | 2.807836  | -3.335435 | -3.773155 |
| H | 2.750467  | -1.636979 | -3.249535 |
| C | 2.191958  | 1.890784  | -1.904084 |
| O | 1.706378  | 2.812617  | -1.383753 |
| O | 2.753540  | 1.114191  | -2.576552 |

Zero-point correction= 0.310088 (Hartree/Particle)

Thermal correction to Energy= 0.327281

Thermal correction to Enthalpy= 0.328225

Thermal correction to Gibbs Free Energy= 0.265808

Sum of electronic and zero-point Energies= -673.495775

Sum of electronic and thermal Energies= -673.478582

Sum of electronic and thermal Enthalpies= -673.477638

Sum of electronic and thermal Free Energies= -673.540055

Imaginary frequency: 581.4140 cm<sup>-1</sup>

IR Intensity: 1462.6471

SCF-energy at M06-2X/6-311+G(d,p)

**E<sub>scf</sub>**= -673.9732952au

## B2

### Cartesian coordinates and thermal corrections at M06-2X/6-31+G(d,p) in TEA solvent

|   |           |           |           |
|---|-----------|-----------|-----------|
| C | -0.568761 | -0.100307 | 0.388564  |
| C | 0.786745  | 0.174844  | 1.077748  |
| O | 0.882410  | 1.566899  | 1.274490  |
| H | -0.839570 | 0.795305  | -0.165939 |
| H | -1.338667 | -0.298558 | 1.140234  |
| H | 1.608498  | -0.166249 | 0.443145  |
| C | 0.903728  | -0.457897 | 2.457496  |
| H | 0.922820  | -1.551210 | 2.414015  |
| H | 1.831732  | -0.121488 | 2.926089  |
| H | 0.070511  | -0.147092 | 3.096773  |
| N | -0.646558 | -1.236320 | -0.616174 |
| C | -2.111928 | -1.460409 | -0.950372 |
| C | -0.089601 | -2.523189 | -0.058246 |
| C | -2.795067 | -0.315463 | -1.677938 |
| C | -0.893960 | -3.136607 | 1.077643  |
| C | 0.065388  | -0.898406 | -1.930892 |
| C | 1.561120  | -1.142635 | -2.014833 |
| H | -2.619465 | -1.655330 | -0.004795 |
| H | -2.139950 | -2.374429 | -1.551894 |
| H | 0.930598  | -2.303857 | 0.258652  |
| H | -0.034277 | -3.218241 | -0.901152 |
| H | -3.835946 | -0.610418 | -1.837379 |
| H | -2.357597 | -0.111929 | -2.656498 |
| H | -2.804488 | 0.608066  | -1.095596 |
| H | -0.281480 | -3.920637 | 1.531293  |
| H | -1.816859 | -3.604114 | 0.729055  |
| H | -1.136391 | -2.418325 | 1.864866  |
| H | -0.134546 | 0.156752  | -2.116168 |
| H | -0.443707 | -1.511820 | -2.680464 |
| H | 1.839387  | -0.917174 | -3.049035 |
| H | 1.845800  | -2.179777 | -1.822853 |
| H | 2.125826  | -0.456838 | -1.386617 |
| C | 1.130570  | 2.362501  | 0.101104  |
| O | 1.193449  | 3.564926  | 0.343667  |
| O | 1.231153  | 1.713402  | -0.963804 |

|                                            |                             |
|--------------------------------------------|-----------------------------|
| Zero-point correction=                     | 0.317100 (Hartree/Particle) |
| Thermal correction to Energy=              | 0.332650                    |
| Thermal correction to Enthalpy=            | 0.333594                    |
| Thermal correction to Gibbs Free Energy=   | 0.275732                    |
| Sum of electronic and zero-point Energies= | -673.551599                 |
| Sum of electronic and thermal Energies=    | -673.536049                 |

Sum of electronic and thermal Enthalpies= -673.535105  
Sum of electronic and thermal Free Energies= -673.592966

SCF-energy at M06-2X/6-311+G(d,p)

$E_{\text{scf}} = -674.0323537\text{au}$

<sup>b</sup>TS<sub>3</sub>

**Cartesian coordinates and thermal corrections at M06-2X/6-31+G(d,p) in TEA solvent**

|   |           |           |           |
|---|-----------|-----------|-----------|
| C | 0.502619  | -0.631743 | -2.052254 |
| C | 1.702703  | -0.427535 | -1.115071 |
| O | 1.244154  | 0.414631  | -0.062890 |
| H | 0.593809  | -0.356655 | -3.090629 |
| H | -0.479429 | -0.728678 | -1.610157 |
| H | 2.449383  | 0.125176  | -1.702513 |
| C | 2.397560  | -1.584928 | -0.420343 |
| H | 2.935758  | -2.222598 | -1.121003 |
| H | 3.132225  | -1.147027 | 0.260170  |
| H | 1.707768  | -2.182200 | 0.177953  |
| N | 0.286402  | -2.522697 | -2.739562 |
| C | -1.161863 | -2.535419 | -3.113841 |
| C | 0.514301  | -3.667977 | -1.821627 |
| C | -1.602234 | -1.586070 | -4.221684 |
| C | -0.355439 | -3.638230 | -0.569822 |
| C | 1.108281  | -2.666099 | -3.965483 |
| C | 2.612287  | -2.648852 | -3.750590 |
| H | -1.727574 | -2.303668 | -2.208227 |
| H | -1.419368 | -3.566132 | -3.400348 |
| H | 1.564977  | -3.678536 | -1.543950 |
| H | 0.320239  | -4.594418 | -2.385236 |
| H | -2.691562 | -1.652520 | -4.293938 |
| H | -1.199634 | -1.857654 | -5.199863 |
| H | -1.359829 | -0.541231 | -4.014649 |
| H | 0.059387  | -4.329816 | 0.168676  |
| H | -1.382606 | -3.952205 | -0.769112 |
| H | -0.384807 | -2.643802 | -0.113784 |
| H | 0.847308  | -1.837619 | -4.628137 |
| H | 0.807694  | -3.594732 | -4.474913 |
| H | 3.097323  | -2.726617 | -4.727823 |
| H | 2.971146  | -3.483817 | -3.143849 |
| H | 2.941718  | -1.709716 | -3.297263 |
| C | 0.499996  | 1.484741  | -0.561630 |
| O | 0.213935  | 2.385126  | 0.206543  |
| O | 0.214773  | 1.329249  | -1.797244 |

|                                                |                             |
|------------------------------------------------|-----------------------------|
| Zero-point correction=                         | 0.314413 (Hartree/Particle) |
| Thermal correction to Energy=                  | 0.329856                    |
| Thermal correction to Enthalpy=                | 0.330800                    |
| Thermal correction to Gibbs Free Energy=       | 0.272815                    |
| Sum of electronic and zero-point Energies=     | -673.504943                 |
| Sum of electronic and thermal Energies=        | -673.489501                 |
| Sum of electronic and thermal Enthalpies=      | -673.488557                 |
| Sum of electronic and thermal Free Energies=   | -673.546542                 |
| Imaginary frequency: 581.9400 cm <sup>-1</sup> |                             |
| IR Intensity: 1485.1047                        |                             |

SCF-energy at M06-2X/6-311+G(d,p)

E<sub>scf</sub> = -673.9822709au

## C1

### Cartesian coordinates and thermal corrections at M06-2X/6-31+G(d,p) in TEA solvent

|   |           |           |           |
|---|-----------|-----------|-----------|
| N | 0.684809  | -1.350674 | -2.561125 |
| C | -0.770899 | -1.277517 | -2.715564 |
| C | 1.063772  | -2.564849 | -1.830722 |
| C | -1.265294 | -0.054880 | -3.479682 |
| C | 0.410373  | -2.698428 | -0.459715 |
| C | 1.351831  | -1.293316 | -3.865646 |
| C | 2.869427  | -1.419010 | -3.798377 |
| H | -1.209327 | -1.251098 | -1.714563 |
| H | -1.149166 | -2.193821 | -3.212908 |
| H | 2.147113  | -2.542370 | -1.688580 |
| H | 0.835202  | -3.464333 | -2.438065 |
| H | -2.353025 | 0.011858  | -3.383723 |
| H | -1.034407 | -0.096864 | -4.546967 |
| H | -0.841148 | 0.870452  | -3.074614 |
| H | 0.909406  | -3.494678 | 0.100620  |
| H | -0.649509 | -2.959340 | -0.517606 |
| H | 0.508435  | -1.767937 | 0.107604  |
| H | 1.112486  | -0.326793 | -4.317099 |
| H | 0.947720  | -2.077489 | -4.537554 |
| H | 3.296120  | -1.136202 | -4.765295 |
| H | 3.201245  | -2.437673 | -3.581485 |
| H | 3.282562  | -0.745621 | -3.040764 |
| C | 1.292878  | 1.035358  | -1.357500 |
| O | 0.683223  | 0.793994  | -0.394961 |
| O | 1.928554  | 1.384008  | -2.269053 |

|                               |                             |
|-------------------------------|-----------------------------|
| Zero-point correction=        | 0.311568 (Hartree/Particle) |
| Thermal correction to Energy= | 0.331092                    |

|                                              |              |
|----------------------------------------------|--------------|
| Thermal correction to Enthalpy=              | 0.332036     |
| Thermal correction to Gibbs Free Energy=     | 0.261428     |
| Sum of electronic and zero-point Energies=   | -3245.494303 |
| Sum of electronic and thermal Energies=      | -3245.474779 |
| Sum of electronic and thermal Enthalpies=    | -3245.473835 |
| Sum of electronic and thermal Free Energies= | -3245.544443 |

SCF-energy at M06-2X/6-311+G(d,p)

$E_{\text{scf}} = -480.9313697\text{au}$

$^{\circ}\text{TS}_1$

**Cartesian coordinates and thermal corrections at M06-2X/6-31+G(d,p) in TEA solvent**

|    |           |           |           |
|----|-----------|-----------|-----------|
| C  | 2.750384  | 1.021644  | -0.754849 |
| C  | 2.049807  | -0.330696 | -0.724495 |
| O  | 1.782051  | 2.064436  | -0.655499 |
| H  | 3.376603  | 1.130618  | 0.131588  |
| C  | 3.585312  | 1.178898  | -2.015984 |
| C  | 0.588418  | 1.757760  | -1.293640 |
| O  | 0.524448  | 0.542665  | -1.674902 |
| O  | -0.237929 | 2.654250  | -1.405147 |
| H  | 1.354405  | -0.571554 | 0.063553  |
| H  | 2.099696  | -0.998406 | -1.570145 |
| Br | 3.720776  | -1.585577 | 0.346381  |
| H  | 2.947440  | 1.096893  | -2.902287 |
| H  | 4.072691  | 2.157502  | -2.023503 |
| H  | 4.354752  | 0.401908  | -2.054834 |
| N  | 0.087316  | 0.751963  | 2.977752  |
| C  | -0.346055 | 2.140674  | 2.792064  |
| C  | -0.530552 | -0.122601 | 1.976202  |
| C  | -0.259685 | 2.953364  | 4.077781  |
| C  | -1.960473 | -0.500706 | 2.340565  |
| C  | 1.550403  | 0.653280  | 2.944157  |
| C  | 2.076618  | -0.603354 | 3.623038  |
| H  | -1.387503 | 2.132605  | 2.456323  |
| H  | 0.232790  | 2.625584  | 1.985787  |
| H  | 0.063384  | -1.040526 | 1.910574  |
| H  | -0.505546 | 0.347777  | 0.975262  |
| H  | -0.601189 | 3.979273  | 3.904218  |
| H  | 0.763163  | 3.008172  | 4.463866  |
| H  | -0.888045 | 2.502221  | 4.852453  |
| H  | -2.389331 | -1.152956 | 1.572863  |
| H  | -2.607157 | 0.378190  | 2.424485  |
| H  | -1.978356 | -1.028071 | 3.299475  |

|                                                |          |           |          |                             |
|------------------------------------------------|----------|-----------|----------|-----------------------------|
| H                                              | 1.956177 | 1.525658  | 3.466608 |                             |
| H                                              | 1.925315 | 0.715258  | 1.906155 |                             |
| H                                              | 3.170676 | -0.606320 | 3.612932 |                             |
| H                                              | 1.755447 | -1.516924 | 3.114908 |                             |
| H                                              | 1.727920 | -0.639763 | 4.660826 |                             |
| Zero-point correction=                         |          |           |          | 0.310907 (Hartree/Particle) |
| Thermal correction to Energy=                  |          |           |          | 0.329931                    |
| Thermal correction to Enthalpy=                |          |           |          | 0.330875                    |
| Thermal correction to Gibbs Free Energy=       |          |           |          | 0.261380                    |
| Sum of electronic and zero-point Energies=     |          |           |          | -3245.477665                |
| Sum of electronic and thermal Energies=        |          |           |          | -3245.458642                |
| Sum of electronic and thermal Enthalpies=      |          |           |          | -3245.457697                |
| Sum of electronic and thermal Free Energies=   |          |           |          | -3245.527193                |
| Imaginary frequency: 505.6953 cm <sup>-1</sup> |          |           |          |                             |
| IR Intensity: 1406.6195                        |          |           |          |                             |

SCF-energy at M06-2X/6-311+G(d,p)

$E_{\text{scf}} = -3248.3237758\text{au}$

#### **nBu<sub>4</sub>NBr**

#### **Cartesian coordinates and thermal corrections at M06-2X/6-31+G(d,p) in gas phase**

|    |           |           |           |
|----|-----------|-----------|-----------|
| C  | -1.486681 | 1.796433  | -0.818403 |
| C  | -2.625136 | 0.843442  | -1.170931 |
| C  | -3.945638 | 1.615722  | -1.218587 |
| C  | -5.107332 | 0.720387  | -1.642854 |
| C  | -0.047975 | 0.715057  | 0.932642  |
| C  | -1.279779 | 0.082337  | 1.557501  |
| C  | -0.948616 | -0.260722 | 3.013935  |
| C  | -2.017823 | -1.166791 | 3.617222  |
| C  | 0.112967  | 0.051356  | -1.505690 |
| C  | 1.542056  | -0.443409 | -1.634632 |
| C  | 1.575161  | -1.591048 | -2.648143 |
| C  | 2.934958  | -2.283105 | -2.636167 |
| C  | 0.874870  | 2.303943  | -0.726199 |
| C  | 2.266237  | 2.138357  | -0.089014 |
| C  | 2.542563  | 3.174390  | 1.004143  |
| C  | 3.944777  | 3.026615  | 1.587636  |
| N  | -0.131941 | 1.183484  | -0.518650 |
| Br | 0.414151  | -2.700956 | 0.622830  |
| H  | -1.741659 | 2.403463  | 0.056429  |
| H  | -1.326902 | 2.478258  | -1.660947 |
| H  | -2.445865 | 0.392910  | -2.152321 |
| H  | -2.706834 | 0.022142  | -0.458142 |

|   |           |           |           |
|---|-----------|-----------|-----------|
| H | -4.152179 | 2.044368  | -0.229279 |
| H | -3.855560 | 2.461208  | -1.913266 |
| H | -6.047702 | 1.276407  | -1.668293 |
| H | -4.934847 | 0.302310  | -2.639444 |
| H | -5.226873 | -0.115121 | -0.946537 |
| H | 0.229464  | 1.607957  | 1.503090  |
| H | 0.753565  | -0.025861 | 0.977818  |
| H | -2.148108 | 0.753525  | 1.535082  |
| H | -1.514308 | -0.852086 | 1.040593  |
| H | 0.014691  | -0.782942 | 3.039127  |
| H | -0.848537 | 0.664257  | 3.598705  |
| H | -1.801453 | -1.392445 | 4.664759  |
| H | -3.008445 | -0.699662 | 3.569563  |
| H | -2.050482 | -2.110663 | 3.064565  |
| H | -0.512634 | -0.784390 | -1.176926 |
| H | -0.238909 | 0.431248  | -2.471853 |
| H | 2.215005  | 0.353290  | -1.976274 |
| H | 1.893622  | -0.837920 | -0.677395 |
| H | 0.803531  | -2.319193 | -2.373884 |
| H | 1.343187  | -1.209018 | -3.652009 |
| H | 2.975163  | -3.094333 | -3.367876 |
| H | 3.742757  | -1.578833 | -2.867039 |
| H | 3.117251  | -2.709030 | -1.644615 |
| H | 0.395899  | 3.196228  | -0.308736 |
| H | 0.938806  | 2.436402  | -1.809764 |
| H | 2.402983  | 1.134658  | 0.318080  |
| H | 3.022075  | 2.243905  | -0.874885 |
| H | 2.419051  | 4.182260  | 0.586697  |
| H | 1.798334  | 3.078327  | 1.804433  |
| H | 4.131564  | 3.774123  | 2.362443  |
| H | 4.079078  | 2.036709  | 2.034369  |
| H | 4.705908  | 3.148816  | 0.810488  |

|                                              |                             |
|----------------------------------------------|-----------------------------|
| Zero-point correction=                       | 0.511061 (Hartree/Particle) |
| Thermal correction to Energy=                | 0.535333                    |
| Thermal correction to Enthalpy=              | 0.536277                    |
| Thermal correction to Gibbs Free Energy=     | 0.455256                    |
| Sum of electronic and zero-point Energies=   | -3257.116834                |
| Sum of electronic and thermal Energies=      | -3257.092562                |
| Sum of electronic and thermal Enthalpies=    | -3257.091618                |
| Sum of electronic and thermal Free Energies= | -3257.172639                |

SCF-energy at M06-2X/6-311+G(d,p)

$E_{\text{scf}} = -3260.1433287\text{au}$



## TS1s

### Cartesian coordinates and thermal corrections at M06-2X/6-31+G(d,p) in gas phase

|   |           |           |           |
|---|-----------|-----------|-----------|
| C | 2.044434  | 1.158400  | -0.867223 |
| C | 2.704481  | 1.922514  | 0.275780  |
| C | 3.446377  | 3.130300  | -0.303622 |
| C | 4.046260  | 4.009344  | 0.790890  |
| C | 2.412391  | -1.323002 | -0.689369 |
| C | 3.715080  | -1.197510 | 0.087197  |
| C | 4.550317  | -2.468339 | -0.092778 |
| C | 5.889670  | -2.381477 | 0.634499  |
| C | 0.805054  | -0.127545 | 0.837429  |
| C | -0.120934 | -1.252779 | 1.283196  |
| C | -0.592711 | -0.980672 | 2.716411  |
| C | -1.627834 | -2.007187 | 3.169628  |
| C | 0.352303  | -0.379073 | -1.630480 |
| C | -0.257413 | -1.772020 | -1.825353 |
| C | -1.731843 | -1.647911 | -2.228269 |
| C | -2.355735 | -3.003884 | -2.541710 |
| N | 1.417377  | -0.202681 | -0.553226 |
| H | 2.752281  | 0.969061  | -1.682610 |
| H | 1.212508  | 1.772991  | -1.226988 |
| H | 1.929196  | 2.285469  | 0.957575  |
| H | 3.405477  | 1.313159  | 0.855225  |
| H | 4.240177  | 2.784397  | -0.979187 |
| H | 2.747692  | 3.719590  | -0.909382 |
| H | 4.578663  | 4.863474  | 0.364950  |
| H | 3.263275  | 4.395752  | 1.450174  |
| H | 4.755237  | 3.443875  | 1.404802  |
| H | 2.630823  | -1.395906 | -1.760912 |
| H | 1.892857  | -2.238693 | -0.397770 |
| H | 4.292498  | -0.336743 | -0.268621 |
| H | 3.525326  | -1.045526 | 1.156129  |
| H | 3.982631  | -3.330619 | 0.277908  |
| H | 4.721021  | -2.643756 | -1.162430 |
| H | 6.471117  | -3.297024 | 0.502073  |
| H | 6.487576  | -1.546148 | 0.256744  |
| H | 5.742569  | -2.229576 | 1.708396  |
| H | 1.647726  | -0.053330 | 1.528671  |
| H | 0.269310  | 0.824861  | 0.842536  |
| H | -1.016288 | -1.316361 | 0.655587  |
| H | 0.379493  | -2.230098 | 1.251819  |
| H | 0.270676  | -0.972561 | 3.395085  |
| H | -1.045173 | 0.017013  | 2.757371  |

|    |           |           |           |
|----|-----------|-----------|-----------|
| H  | -1.927413 | -1.826934 | 4.205227  |
| H  | -2.522663 | -1.934365 | 2.543952  |
| H  | -1.229564 | -3.026059 | 3.105173  |
| H  | 0.841121  | -0.064299 | -2.558210 |
| H  | -0.391946 | 0.384257  | -1.394954 |
| H  | 0.294588  | -2.314065 | -2.603463 |
| H  | -0.196681 | -2.385926 | -0.925047 |
| H  | -2.298726 | -1.166913 | -1.418838 |
| H  | -1.815532 | -0.986867 | -3.100952 |
| H  | -3.407830 | -2.892262 | -2.813061 |
| H  | -1.838858 | -3.499727 | -3.370671 |
| H  | -2.307537 | -3.663148 | -1.668594 |
| C  | -2.103448 | 2.506256  | -0.546940 |
| C  | -2.044103 | 1.364991  | 0.370121  |
| O  | -0.716621 | 2.430366  | -0.385785 |
| H  | -1.683905 | 0.445460  | -0.046970 |
| H  | -1.894472 | 1.559051  | 1.422163  |
| Br | -4.029324 | 0.080714  | 0.759451  |
| C  | -2.640599 | 2.251550  | -1.939497 |
| H  | -2.366409 | 3.076153  | -2.604998 |
| H  | -2.222190 | 1.324654  | -2.346688 |
| H  | -3.729701 | 2.149518  | -1.916857 |
| H  | -2.551751 | 3.407271  | -0.105737 |

|                                                |                             |
|------------------------------------------------|-----------------------------|
| Zero-point correction=                         | 0.597773 (Hartree/Particle) |
| Thermal correction to Energy=                  | 0.627684                    |
| Thermal correction to Enthalpy=                | 0.628628                    |
| Thermal correction to Gibbs Free Energy=       | 0.535015                    |
| Sum of electronic and zero-point Energies=     | -3450.030658                |
| Sum of electronic and thermal Energies=        | -3450.000747                |
| Sum of electronic and thermal Enthalpies=      | -3449.999802                |
| Sum of electronic and thermal Free Energies=   | -3450.093416                |
| Imaginary frequency: 479.5765 cm <sup>-1</sup> |                             |
| IR Intensity: 983.2199                         |                             |

SCF-energy at M06-2X/6-311+G(d,p)

$E_{\text{scf}} = -3453.1882547$  au

## A1s

### Cartesian coordinates and thermal corrections at M06-2X/6-31+G(d,p) in gas phase

|   |          |          |           |
|---|----------|----------|-----------|
| C | 1.886283 | 1.113040 | -1.087531 |
| C | 2.228553 | 2.267507 | -0.154061 |
| C | 2.675850 | 3.464815 | -0.996772 |
| C | 2.954545 | 4.694532 | -0.135963 |

|   |           |           |           |
|---|-----------|-----------|-----------|
| C | 2.815877  | -1.079155 | -0.298539 |
| C | 3.984878  | -0.449522 | 0.445881  |
| C | 5.126110  | -1.461149 | 0.581569  |
| C | 6.341448  | -0.861428 | 1.284984  |
| C | 0.871329  | 0.000271  | 0.872636  |
| C | 0.186333  | -1.182672 | 1.537674  |
| C | -0.292816 | -0.752679 | 2.929132  |
| C | -1.274475 | -1.753161 | 3.533692  |
| C | 0.646913  | -0.926224 | -1.456255 |
| C | 0.495513  | -2.442372 | -1.391782 |
| C | -0.673661 | -2.851933 | -2.293603 |
| C | -0.836001 | -4.367360 | -2.376422 |
| N | 1.575048  | -0.247656 | -0.450734 |
| H | 2.694000  | 0.917179  | -1.803272 |
| H | 0.963716  | 1.393674  | -1.606217 |
| H | 1.323234  | 2.547733  | 0.393002  |
| H | 3.012402  | 2.022680  | 0.571251  |
| H | 3.576134  | 3.200804  | -1.568287 |
| H | 1.890546  | 3.694125  | -1.726770 |
| H | 3.271592  | 5.544090  | -0.746473 |
| H | 2.056893  | 4.991879  | 0.414529  |
| H | 3.745165  | 4.491662  | 0.594526  |
| H | 3.131741  | -1.336580 | -1.316126 |
| H | 2.514135  | -2.006339 | 0.196138  |
| H | 4.350899  | 0.430340  | -0.094891 |
| H | 3.683927  | -0.115224 | 1.445091  |
| H | 4.771705  | -2.337890 | 1.137773  |
| H | 5.415847  | -1.819853 | -0.414179 |
| H | 7.146962  | -1.593852 | 1.378895  |
| H | 6.730848  | -0.002762 | 0.728979  |
| H | 6.080067  | -0.517800 | 2.290796  |
| H | 1.626454  | 0.420335  | 1.541273  |
| H | 0.113339  | 0.759341  | 0.617338  |
| H | -0.686315 | -1.484498 | 0.946461  |
| H | 0.838181  | -2.060054 | 1.642389  |
| H | 0.575629  | -0.626550 | 3.588294  |
| H | -0.771959 | 0.231715  | 2.857974  |
| H | -1.573169 | -1.455572 | 4.542042  |
| H | -2.180768 | -1.819088 | 2.922740  |
| H | -0.831823 | -2.753414 | 3.593786  |
| H | 1.060065  | -0.665080 | -2.436912 |
| H | -0.297654 | -0.373743 | -1.345713 |
| H | 1.406621  | -2.945609 | -1.739661 |
| H | 0.299355  | -2.802082 | -0.379282 |

|    |           |           |           |
|----|-----------|-----------|-----------|
| H  | -1.594847 | -2.396663 | -1.910220 |
| H  | -0.522409 | -2.437035 | -3.298264 |
| H  | -1.683344 | -4.640086 | -3.010457 |
| H  | 0.061125  | -4.836755 | -2.793530 |
| H  | -1.008786 | -4.797023 | -1.384221 |
| C  | -2.289352 | 1.608150  | -0.741349 |
| C  | -2.752923 | 0.464050  | 0.178440  |
| O  | -0.927987 | 1.519810  | -0.796388 |
| H  | -2.560659 | -0.504963 | -0.292117 |
| H  | -2.230141 | 0.525538  | 1.133380  |
| Br | -4.657717 | 0.456146  | 0.649130  |
| C  | -2.941126 | 1.489296  | -2.124071 |
| H  | -2.557346 | 2.289141  | -2.763824 |
| H  | -2.655514 | 0.529469  | -2.577360 |
| H  | -4.034283 | 1.552360  | -2.088986 |
| H  | -2.652584 | 2.552419  | -0.279136 |

|                                              |                             |
|----------------------------------------------|-----------------------------|
| Zero-point correction=                       | 0.597040 (Hartree/Particle) |
| Thermal correction to Energy=                | 0.627272                    |
| Thermal correction to Enthalpy=              | 0.628216                    |
| Thermal correction to Gibbs Free Energy=     | 0.531811                    |
| Sum of electronic and zero-point Energies=   | -3450.054843                |
| Sum of electronic and thermal Energies=      | -3450.024612                |
| Sum of electronic and thermal Enthalpies=    | -3450.023668                |
| Sum of electronic and thermal Free Energies= | -3450.120073                |

SCF-energy at M06-2X/6-311+G(d,p)

$E_{\text{scf}} = -3453.2119641\text{au}$

## TS2s

### Cartesian coordinates and thermal corrections at M06-2X/6-31+G(d,p) in gas phase

|   |           |           |           |
|---|-----------|-----------|-----------|
| C | 0.158376  | -1.088300 | 0.555480  |
| C | 0.328973  | -2.438592 | -0.125564 |
| C | -0.921083 | -3.281570 | 0.146577  |
| C | -0.792988 | -4.688047 | -0.432143 |
| C | 2.283189  | -0.093957 | 1.410559  |
| C | 2.964762  | -1.438687 | 1.619830  |
| C | 4.078017  | -1.296596 | 2.661799  |
| C | 4.765649  | -2.628348 | 2.952382  |
| C | 1.830133  | -0.206634 | -1.056869 |
| C | 2.745023  | 0.892825  | -1.574731 |
| C | 3.356084  | 0.440724  | -2.904535 |
| C | 4.212634  | 1.528723  | -3.546117 |
| C | 0.512156  | 1.314194  | 0.426189  |

|   |           |           |           |
|---|-----------|-----------|-----------|
| C | 1.312277  | 2.550915  | 0.822435  |
| C | 0.395204  | 3.772148  | 0.694603  |
| C | 1.068746  | 5.052098  | 1.181538  |
| N | 1.243330  | -0.025422 | 0.325360  |
| H | 0.057717  | -1.179081 | 1.641586  |
| H | -0.763565 | -0.642702 | 0.185329  |
| H | 0.403169  | -2.306502 | -1.208901 |
| H | 1.221505  | -2.976094 | 0.215024  |
| H | -1.114181 | -3.334551 | 1.226146  |
| H | -1.777562 | -2.771902 | -0.311435 |
| H | -1.705513 | -5.266765 | -0.268027 |
| H | -0.611012 | -4.646004 | -1.510650 |
| H | 0.037657  | -5.231176 | 0.030787  |
| H | 1.767455  | 0.202680  | 2.329859  |
| H | 3.029626  | 0.671611  | 1.185654  |
| H | 2.240609  | -2.181526 | 1.970005  |
| H | 3.396149  | -1.817066 | 0.685701  |
| H | 4.816930  | -0.567819 | 2.305899  |
| H | 3.657493  | -0.888097 | 3.589085  |
| H | 5.558719  | -2.509630 | 3.694526  |
| H | 4.050593  | -3.360830 | 3.339530  |
| H | 5.213679  | -3.044284 | 2.044336  |
| H | 2.364126  | -1.159189 | -1.043413 |
| H | 0.966891  | -0.302230 | -1.721996 |
| H | 2.173163  | 1.811924  | -1.745650 |
| H | 3.552925  | 1.128074  | -0.870287 |
| H | 3.961553  | -0.459172 | -2.737494 |
| H | 2.547944  | 0.153547  | -3.588256 |
| H | 4.645036  | 1.184767  | -4.488949 |
| H | 3.615259  | 2.420950  | -3.757778 |
| H | 5.035830  | 1.823230  | -2.886665 |
| H | -0.267824 | 1.157246  | 1.177721  |
| H | 0.032865  | 1.442099  | -0.550587 |
| H | 1.645962  | 2.475811  | 1.863556  |
| H | 2.203106  | 2.701751  | 0.205973  |
| H | 0.091586  | 3.885417  | -0.353720 |
| H | -0.522587 | 3.593858  | 1.269020  |
| H | 0.402981  | 5.911966  | 1.074899  |
| H | 1.344223  | 4.971650  | 2.237856  |
| H | 1.979911  | 5.259320  | 0.610488  |
| C | -3.575588 | -0.446148 | 0.166911  |
| C | -3.037107 | 0.746934  | -0.459303 |
| O | -4.038812 | 0.614207  | 1.018971  |
| H | -3.664153 | 1.317969  | -1.131048 |

|    |           |           |           |
|----|-----------|-----------|-----------|
| H  | -2.146636 | 1.193491  | -0.047616 |
| Br | -1.577988 | -0.130852 | -2.350032 |
| C  | -4.680272 | -1.196374 | -0.524957 |
| H  | -5.193969 | -1.854139 | 0.180235  |
| H  | -5.406297 | -0.498535 | -0.949305 |
| H  | -4.249364 | -1.794173 | -1.333743 |
| H  | -2.840201 | -1.073664 | 0.669255  |
| C  | -3.119431 | 0.916215  | 2.342439  |
| O  | -3.770639 | 1.568460  | 3.105527  |
| O  | -2.007308 | 0.423135  | 2.201437  |

|                                                |                             |
|------------------------------------------------|-----------------------------|
| Zero-point correction=                         | 0.611476 (Hartree/Particle) |
| Thermal correction to Energy=                  | 0.644700                    |
| Thermal correction to Enthalpy=                | 0.645645                    |
| Thermal correction to Gibbs Free Energy=       | 0.543729                    |
| Sum of electronic and zero-point Energies=     | -3638.560620                |
| Sum of electronic and thermal Energies=        | -3638.527396                |
| Sum of electronic and thermal Enthalpies=      | -3638.526452                |
| Sum of electronic and thermal Free Energies=   | -3638.628368                |
| Imaginary frequency: 537.8675 cm <sup>-1</sup> |                             |
| IR Intensity: 1196.4573                        |                             |

SCF-energy at M06-2X/6-311+G(d,p)

E<sub>scf</sub> = -3641.780417au

## A2s

### Cartesian coordinates and thermal corrections at M06-2X/6-31+G(d,p) in gas phase

|   |           |           |           |
|---|-----------|-----------|-----------|
| C | 0.743460  | 0.994663  | -0.492279 |
| C | 0.401382  | 1.954298  | 0.639027  |
| C | -0.984262 | 2.544074  | 0.356820  |
| C | -1.507847 | 3.363258  | 1.533020  |
| C | 3.124758  | 0.786276  | -1.202383 |
| C | 3.521210  | 2.200632  | -0.805058 |
| C | 4.596049  | 2.734954  | -1.755545 |
| C | 5.035726  | 4.149706  | -1.386477 |
| C | 2.422337  | 0.015888  | 1.076804  |
| C | 3.608955  | -0.884192 | 1.387980  |
| C | 3.963976  | -0.751581 | 2.871986  |
| C | 5.107667  | -1.679567 | 3.273492  |
| C | 1.667810  | -1.205908 | -0.971483 |
| C | 2.796001  | -2.063496 | -1.536990 |
| C | 2.261011  | -3.476751 | -1.789888 |
| C | 3.285399  | -4.361344 | -2.495238 |
| N | 2.033974  | 0.157835  | -0.381871 |

|    |           |           |           |
|----|-----------|-----------|-----------|
| H  | 0.823274  | 1.521181  | -1.450087 |
| H  | -0.063882 | 0.265542  | -0.569464 |
| H  | 0.334703  | 1.399115  | 1.578070  |
| H  | 1.136643  | 2.760528  | 0.755980  |
| H  | -0.957584 | 3.159273  | -0.552325 |
| H  | -1.674284 | 1.715604  | 0.159589  |
| H  | -2.484238 | 3.800433  | 1.306597  |
| H  | -1.618393 | 2.728665  | 2.417752  |
| H  | -0.824265 | 4.182155  | 1.782727  |
| H  | 2.763461  | 0.773869  | -2.236745 |
| H  | 3.994561  | 0.128740  | -1.151252 |
| H  | 2.652750  | 2.867644  | -0.834201 |
| H  | 3.910473  | 2.219137  | 0.219851  |
| H  | 5.463156  | 2.062611  | -1.741713 |
| H  | 4.209761  | 2.724564  | -2.782365 |
| H  | 5.796770  | 4.520515  | -2.077370 |
| H  | 4.188836  | 4.842494  | -1.416577 |
| H  | 5.456026  | 4.178303  | -0.376212 |
| H  | 2.618066  | 1.027058  | 1.439245  |
| H  | 1.521450  | -0.366554 | 1.564144  |
| H  | 3.353760  | -1.929633 | 1.184167  |
| H  | 4.494309  | -0.633503 | 0.788429  |
| H  | 4.237495  | 0.289096  | 3.088093  |
| H  | 3.074548  | -0.973561 | 3.473108  |
| H  | 5.349804  | -1.573268 | 4.333908  |
| H  | 4.842276  | -2.726135 | 3.093836  |
| H  | 6.013415  | -1.459236 | 2.698537  |
| H  | 0.953020  | -1.000325 | -1.772821 |
| H  | 1.096347  | -1.703804 | -0.181057 |
| H  | 3.156710  | -1.645913 | -2.485323 |
| H  | 3.660607  | -2.126852 | -0.870496 |
| H  | 1.973151  | -3.924380 | -0.831332 |
| H  | 1.342492  | -3.418139 | -2.386080 |
| H  | 2.896791  | -5.371484 | -2.646552 |
| H  | 3.547766  | -3.952867 | -3.476748 |
| H  | 4.206902  | -4.440608 | -1.908655 |
| C  | -3.818263 | -0.950931 | 0.826294  |
| C  | -3.996715 | 0.267225  | -0.073937 |
| O  | -2.588415 | -0.794527 | 1.525699  |
| H  | -4.001430 | 1.183214  | 0.520796  |
| H  | -3.217149 | 0.290423  | -0.832291 |
| Br | -5.687896 | 0.231620  | -1.035090 |
| C  | -4.894870 | -1.084106 | 1.888938  |
| H  | -4.652475 | -1.923454 | 2.544510  |

|                                              |           |           |           |                             |
|----------------------------------------------|-----------|-----------|-----------|-----------------------------|
| H                                            | -4.937907 | -0.173844 | 2.496314  |                             |
| H                                            | -5.873729 | -1.252177 | 1.435831  |                             |
| H                                            | -3.773806 | -1.845868 | 0.196078  |                             |
| C                                            | -1.407506 | -1.052238 | 0.828606  |                             |
| O                                            | -1.490550 | -1.289322 | -0.395379 |                             |
| O                                            | -0.384699 | -0.968059 | 1.539830  |                             |
| Zero-point correction=                       |           |           |           | 0.614372 (Hartree/Particle) |
| Thermal correction to Energy=                |           |           |           | 0.647210                    |
| Thermal correction to Enthalpy=              |           |           |           | 0.648154                    |
| Thermal correction to Gibbs Free Energy=     |           |           |           | 0.545573                    |
| Sum of electronic and zero-point Energies=   |           |           |           | -3638.602451                |
| Sum of electronic and thermal Energies=      |           |           |           | -3638.569613                |
| Sum of electronic and thermal Enthalpies=    |           |           |           | -3638.568669                |
| Sum of electronic and thermal Free Energies= |           |           |           | -3638.671249                |

SCF-energy at M06-2X/6-311+G(d,p)

$E_{\text{scf}} = -3641.8315984\text{au}$

### TS3s

#### Cartesian coordinates and thermal corrections at M06-2X/6-31+G(d,p) in gas phase

|   |           |           |           |
|---|-----------|-----------|-----------|
| C | -0.768270 | -1.023230 | -1.333531 |
| C | -0.219914 | -2.151391 | -0.467410 |
| C | 0.893026  | -2.880539 | -1.230169 |
| C | 1.660989  | -3.841420 | -0.324723 |
| C | -3.256072 | -0.771669 | -1.164281 |
| C | -3.483058 | -2.240485 | -0.833509 |
| C | -4.919682 | -2.638981 | -1.184535 |
| C | -5.182986 | -4.117768 | -0.910780 |
| C | -1.764750 | -0.066465 | 0.724585  |
| C | -2.564846 | 1.007668  | 1.442686  |
| C | -2.184837 | 0.986590  | 2.926870  |
| C | -2.896546 | 2.089571  | 3.705281  |
| C | -1.773342 | 1.188810  | -1.437849 |
| C | -3.012953 | 2.074799  | -1.538403 |
| C | -2.558930 | 3.503357  | -1.855923 |
| C | -3.739492 | 4.448992  | -2.057974 |
| N | -1.925191 | -0.183993 | -0.779054 |
| H | -1.115372 | -1.395960 | -2.303894 |
| H | 0.043341  | -0.311444 | -1.490974 |
| H | 0.213058  | -1.734474 | 0.447107  |
| H | -0.985288 | -2.872270 | -0.162892 |
| H | 0.459513  | -3.420516 | -2.082046 |
| H | 1.591153  | -2.143978 | -1.649743 |



|    |           |           |           |
|----|-----------|-----------|-----------|
| H  | 2.423355  | -4.384486 | -0.887910 |
| H  | 2.180930  | -3.299629 | 0.472996  |
| H  | 0.985965  | -4.573730 | 0.131610  |
| H  | -3.346384 | -0.623015 | -2.245769 |
| H  | -4.018802 | -0.156969 | -0.679920 |
| H  | -2.790162 | -2.871994 | -1.400527 |
| H  | -3.310355 | -2.439146 | 0.230307  |
| H  | -5.619317 | -2.024485 | -0.604780 |
| H  | -5.111507 | -2.418944 | -2.242254 |
| H  | -6.212388 | -4.387986 | -1.157711 |
| H  | -4.517123 | -4.750661 | -1.505582 |
| H  | -5.017353 | -4.355254 | 0.144773  |
| H  | -1.981234 | -1.054587 | 1.137957  |
| H  | -0.705799 | 0.140209  | 0.865144  |
| H  | -2.295533 | 1.992985  | 1.051791  |
| H  | -3.647902 | 0.859105  | 1.335709  |
| H  | -2.419195 | 0.005663  | 3.361371  |
| H  | -1.099957 | 1.129096  | 3.008425  |
| H  | -2.624726 | 2.062442  | 4.763329  |
| H  | -2.617810 | 3.071844  | 3.312253  |
| H  | -3.984824 | 1.987316  | 3.633888  |
| H  | -1.410777 | 0.982744  | -2.449639 |
| H  | -0.973399 | 1.688776  | -0.881059 |
| H  | -3.684538 | 1.720005  | -2.329878 |
| H  | -3.591400 | 2.089900  | -0.611437 |
| H  | -1.919909 | 3.857409  | -1.038114 |
| H  | -1.931921 | 3.494400  | -2.756671 |
| H  | -3.397753 | 5.464680  | -2.271668 |
| H  | -4.369070 | 4.123689  | -2.892963 |
| H  | -4.366193 | 4.489531  | -1.161028 |
| C  | 2.547401  | 0.492283  | 1.951096  |
| C  | 2.701341  | -0.029900 | 0.526723  |
| O  | 1.816270  | 1.733081  | 1.929302  |
| H  | 2.224632  | -0.942811 | 0.211655  |
| H  | 3.325287  | 0.493441  | -0.181433 |
| Br | 4.578708  | -1.476335 | 0.985517  |
| C  | 1.820753  | -0.494514 | 2.850809  |
| H  | 1.683716  | -0.062526 | 3.844646  |
| H  | 0.829535  | -0.723978 | 2.437868  |
| H  | 2.400037  | -1.417185 | 2.927693  |
| H  | 3.528509  | 0.737064  | 2.355286  |
| C  | 0.960513  | 1.821982  | 0.878195  |
| O  | 1.163812  | 0.917690  | -0.020235 |
| O  | 0.080355  | 2.674007  | 0.870055  |

|                                                |                             |
|------------------------------------------------|-----------------------------|
| Zero-point correction=                         | 0.614148 (Hartree/Particle) |
| Thermal correction to Energy=                  | 0.646228                    |
| Thermal correction to Enthalpy=                | 0.647173                    |
| Thermal correction to Gibbs Free Energy=       | 0.547370                    |
| Sum of electronic and zero-point Energies=     | -3638.575832                |
| Sum of electronic and thermal Energies=        | -3638.543752                |
| Sum of electronic and thermal Enthalpies=      | -3638.542808                |
| Sum of electronic and thermal Free Energies=   | -3638.642611                |
| Imaginary frequency: 503.2989 cm <sup>-1</sup> |                             |
| IR Intensity: 1343.4080                        |                             |

SCF-energy at M06-2X/6-311+G(d,p)

$E_{\text{scf}} = -3641.80561294\text{au}$
